# Supplementary material for: Relationship between quality of care and choice of clinical computing system: retrospective analysis of family practice performance under the UK's quality and outcomes framework
Source: HighWire-hosted journal article supplement (doi:10.1136/bmjopen-2013-003190), 2013-08-01

## A. Appendix

Table A-1: Regression analyses on Reported Achievement, Population Achievement and % of Points Achieved across all 62 clinical indicators

|                                 | Reported Achievement      |         | Population Achievement    |         | Percentage of points scored |         |
|---------------------------------|---------------------------|---------|---------------------------|---------|-----------------------------|---------|
|                                 | coeff (CI)                | p-value | coeff (CI)                | p-value | coeff (CI)                  | p-value |
| Clinical computer system*       |                           |         |                           |         |                             |         |
| LV                              | -<br>(-, -)               | -       | -<br>(-, -)               | -       | -<br>(-, -)                 | -       |
| PCS                             | -0.72<br>(-0.84, -0.61)   | <0.001  | -0.76<br>(-0.89, -0.63)   | <0.001  | -0.40<br>(-0.55, -0.25)     | <0.001  |
| Practice Manager                | 0.42<br>(0.11, 0.73)      | 0.008   | -0.33<br>(-0.66, 0.002)   | 0.052   | -0.34<br>(-0.73, 0.05)      | 0.088   |
| Premiere                        | 0.38<br>(0.13, 0.64)      | 0.003   | 0.03<br>(-0.24, 0.30)     | 0.821   | 0.37<br>(0.05, 0.68)        | 0.022   |
| ProdSysOneX                     | 0.16<br>(0.03, 0.30)      | 0.020   | -0.52<br>(-0.66, -0.38)   | <0.001  | -0.11<br>(-0.27, 0.05)      | 0.172   |
| Synergy                         | 0.42<br>(0.29, 0.54)      | <0.001  | 0.54<br>(0.38, 0.69)      | <0.001  | 0.38<br>(0.23, 0.53)        | <0.001  |
| Vision 3                        | 0.72<br>(0.61, 0.83)      | <0.001  | 0.35<br>(0.23, 0.47)      | <0.001  | 0.10<br>(-0.04, 0.24)       | 0.151   |
| year                            |                           |         |                           |         |                             |         |
| 2007-8                          | -<br>(-, -)               | -       | -<br>(-, -)               | -       | -<br>(-, -)                 | -       |
| 2008-9                          | 0.03<br>(-0.07, 0.13)     | 0.527   | 0.42<br>(0.32, 0.52)      | <0.001  | 0.27<br>(0.13, 0.40)        | <0.001  |
| 2009-10                         | -0.22<br>(-0.33, -0.12)   | <0.001  | 0.02<br>(-0.08, 0.12)     | 0.686   | -0.24<br>(-0.38, -0.11)     | 0.001   |
| 2010-11                         | 0.07<br>(-0.03, 0.17)     | 0.197   | 0.32<br>(0.22, 0.42)      | <0.001  | 0.16<br>(0.02, 0.29)        | 0.022   |
| List size (1000)                | -0.11<br>(-0.12, -0.10)   | <0.001  | -0.14<br>(-0.15, -0.13)   | <0.001  | 0.08<br>(0.07, 0.10)        | <0.001  |
| IMD 2010 <sup>†</sup>           | -0.01<br>(-0.012, -0.007) | <0.001  | -0.02<br>(-0.022, -0.016) | <0.001  | -0.006<br>(-0.01, -0.002)   | 0.001   |
| Non-urban practice <sup>‡</sup> | -0.11<br>(-0.21, -0.01)   | 0.032   | 0.04<br>(-0.07, 0.14)     | 0.496   | -0.18<br>(-0.30, -0.06)     | 0.003   |
| GP contract                     |                           |         |                           |         |                             |         |
| General Medical Services        | -                         | -       | -                         | -       | -                           | -       |

|                                             | Reported Achievement      |         | Population Achievement    |         | Percentage of points scored |         |
|---------------------------------------------|---------------------------|---------|---------------------------|---------|-----------------------------|---------|
|                                             | coeff (CI)                | p-value | coeff (CI)                | p-value | coeff (CI)                  | p-value |
|                                             | (-, -)                    |         | (-, -)                    |         | (-, -)                      |         |
| Personal Medical Services                   | 0.17<br>(0.09,0.25)       | <0.001  | 0.08<br>(-0.01,0.17)      | 0.072   | 0.23<br>(0.12,0.34)         | <0.001  |
| Alternative Provider Medical Services       | -0.73<br>(-1.18,-0.29)    | 0.001   | -2.20<br>(-2.63,-1.76)    | <0.001  | -2.99<br>(-3.71,-2.27)      | <0.001  |
| Primary Care Trust Medical Services         | -1.52<br>(-2.03,-1.00)    | <0.001  | -2.38<br>(-2.89,-1.87)    | <0.001  | -2.83<br>(-3.74,-1.91)      | <0.001  |
|                                             |                           |         |                           |         |                             |         |
| Practice % female patients                  | 0.09<br>(0.06,0.12)       | <0.001  | 0.08<br>(0.05,0.11)       | <0.001  | 0.24<br>(0.18,0.29)         | <0.001  |
| Practice % patients 65 or over              | -0.03<br>(-0.04,-0.02)    | <0.001  | 0.02<br>(0.01,0.03)       | <0.001  | 0.04<br>(0.03,0.06)         | <0.001  |
| Practice mean General Practitioner (GP) age | -0.016<br>(-0.024,-0.008) | <0.001  | -0.013<br>(-0.021,-0.005) | 0.001   | -0.07<br>(-0.08,-0.05)      | <0.001  |
| Practice % female GPs                       | 0.006<br>(0.004,0.008)    | <0.001  | 0.006<br>(0.004,0.008)    | <0.001  | 0.009<br>(0.006,0.011)      | <0.001  |
| Practice % of GPs qualified in the UK       | 0.002<br>(0.00002,0.003)  | 0.047   | -0.001<br>(-0.003,0.0004) | 0.139   | 0.002<br>(-0.0001,0.005)    | 0.056   |
| Practice % of GP providers§                 | 0.006<br>(0.004,0.008)    | <0.001  | 0.010<br>(0.008,0.012)    | <0.001  | 0.011<br>(0.008,0.014)      | <0.001  |

\* Overall, statistically significant differences between clinical systems were observed within each indicator group for each of the regressions ( $p < 0.001$  in all three  $\chi^2$  tests).

† Index of Multiple Deprivation at the Lower Super Output Area level

‡ Area classed as urban if population at the Middle Super Output Area level is 10,000 or more. Non-urban areas cover towns, fringes, villages, hamlets and isolated dwellings.

§ General practitioners that has had at least 5 years in training as a foundation doctors and specialty registrars

**Table A-2: Regression analyses on Reported Achievement, Population Achievement and % of Points Achieved across measurement, treatment and outcome indicators (35, 16 and 11 respectively)\***

|                                                                                   | Reported Achievement   |         | Population Achievement |         | Percentage of points Achieved |         |
|-----------------------------------------------------------------------------------|------------------------|---------|------------------------|---------|-------------------------------|---------|
|                                                                                   | coeff (CI)             | p-value | coeff (CI)             | p-value | coeff (CI)                    | p-value |
| <b>Indicator category</b>                                                         |                        |         |                        |         |                               |         |
| Measurement                                                                       | - (-,-)                | -       | - (-,-)                | -       | - (-,-)                       | -       |
| Treatment                                                                         | -2.57 (-2.65,-2.50)    | <0.001  | -9.40 (-9.48,-9.32)    | <0.001  | 1.02 (0.91,1.13)              | <0.001  |
| Outcome                                                                           | -13.44 (-13.53,-13.35) | <0.001  | -16.05 (-16.15,-15.96) | <0.001  | 0.39 (0.28,0.50)              | <0.001  |
| <b>Clinical computer system<sup>†</sup></b>                                       |                        |         |                        |         |                               |         |
| LV                                                                                | - (-,-)                | -       | - (-,-)                | -       | - (-,-)                       | -       |
| PCS                                                                               | -0.65 (-0.77,-0.53)    | <0.001  | -0.81 (-0.93,-0.68)    | <0.001  | -0.48 (-0.65,-0.32)           | <0.001  |
| Practice Manager                                                                  | 0.17 (-0.11,0.44)      | 0.231   | -0.33 (-0.63,-0.02)    | 0.036   | -0.53 (-0.93,-0.13)           | 0.010   |
| Premiere                                                                          | 0.29 (0.06,0.52)       | 0.015   | 0.03 (-0.22,0.28)      | 0.815   | 0.39 (0.04,0.74)              | 0.029   |
| ProdSysOneX                                                                       | -0.06 (-0.17,0.06)     | 0.354   | -0.66 (-0.80,-0.53)    | <0.001  | -0.14 (-0.32,0.04)            | 0.122   |
| Synergy                                                                           | 0.43 (0.31,0.56)       | <0.001  | 0.51 (0.36,0.66)       | <0.001  | 0.64 (0.41,0.87)              | <0.001  |
| Vision 3                                                                          | 0.51 (0.41,0.62)       | <0.001  | 0.26 (0.14,0.38)       | <0.001  | -0.09 (-0.24,0.06)            | 0.239   |
| <b>Indicator category by Clinical computer system (interactions)<sup>†‡</sup></b> |                        |         |                        |         |                               |         |
| Measurement × LV                                                                  | - (-,-)                | -       | - (-,-)                | -       | - (-,-)                       | -       |
| Measurement × PCS                                                                 | - (-,-)                | -       | - (-,-)                | -       | - (-,-)                       | -       |
| Measurement × Practice Manager                                                    | - (-,-)                | -       | - (-,-)                | -       | - (-,-)                       | -       |
| Measurement × Premiere                                                            | - (-,-)                | -       | - (-,-)                | -       | - (-,-)                       | -       |
| Measurement × ProdSysOneX                                                         | - (-,-)                | -       | - (-,-)                | -       | - (-,-)                       | -       |
| Measurement × Synergy                                                             | - (-,-)                | -       | - (-,-)                | -       | - (-,-)                       | -       |
| Measurement × Vision 3                                                            | - (-,-)                | -       | - (-,-)                | -       | - (-,-)                       | -       |
| Treatment × LV                                                                    | - (-,-)                | -       | - (-,-)                | -       | - (-,-)                       | -       |

|                              | Reported Achievement     |         | Population Achievement    |         | Percentage of points Achieved |         |
|------------------------------|--------------------------|---------|---------------------------|---------|-------------------------------|---------|
|                              | coeff (CI)               | p-value | coeff (CI)                | p-value | coeff (CI)                    | p-value |
| Treatment × PCS              | -0.33<br>(-0.50,-0.16)   | <0.001  | 0.25<br>(0.06,0.43)       | 0.008   | 0.10<br>(-0.12,0.32)          | 0.362   |
| Treatment × Practice Manager | -0.35<br>(-0.73,0.03)    | 0.071   | -0.63<br>(-1.02,-0.24)    | 0.001   | -0.36<br>(-0.89,0.17)         | 0.183   |
| Treatment × Premiere         | -0.87<br>(-1.23,-0.51)   | <0.001  | -0.85<br>(-1.22,-0.48)    | <0.001  | -0.33<br>(-0.82,0.15)         | 0.178   |
| Treatment × ProdSysOneX      | 0.09<br>(-0.08,0.26)     | 0.299   | 0.15<br>(-0.03,0.32)      | 0.101   | -0.17<br>(-0.41,0.06)         | 0.147   |
| Treatment × Synergy          | -0.64<br>(-0.83,-0.45)   | <0.001  | -0.60<br>(-0.81,-0.38)    | <0.001  | -0.59<br>(-0.91,-0.26)        | <0.001  |
| Treatment × Vision 3         | -0.28<br>(-0.44,-0.12)   | <0.001  | -0.30<br>(-0.46,-0.13)    | <0.001  | -0.03<br>(-0.23,0.17)         | 0.780   |
| Outcome × LV                 | -<br>(-, -)              | -       | -<br>(-, -)               | -       | -<br>(-, -)                   | -       |
| Outcome × PCS                | -0.21<br>(-0.41,-0.01)   | 0.040   | -0.16<br>(-0.38,0.05)     | 0.131   | 0.12<br>(-0.10,0.34)          | 0.281   |
| Outcome × Practice Manager   | 1.66<br>(1.22,2.10)      | <0.001  | 1.06<br>(0.61,1.51)       | <0.001  | 0.99<br>(0.46,1.52)           | <0.001  |
| Outcome × Premiere           | 0.91<br>(0.49,1.33)      | <0.001  | 0.58<br>(0.14,1.01)       | 0.009   | 0.13<br>(-0.36,0.61)          | 0.614   |
| Outcome × ProdSysOneX        | 0.84<br>(0.64,1.03)      | <0.001  | 0.40<br>(0.18,0.61)       | <0.001  | 0.19<br>(-0.05,0.42)          | 0.115   |
| Outcome × Synergy            | 0.45<br>(0.22,0.68)      | <0.001  | 0.60<br>(0.33,0.86)       | <0.001  | -0.35<br>(-0.67,-0.03)        | 0.033   |
| Outcome × Vision 3           | 0.99<br>(0.81,1.16)      | <0.001  | 0.71<br>(0.52,0.89)       | <0.001  | 0.65<br>(0.45,0.85)           | <0.001  |
|                              |                          |         |                           |         |                               |         |
| year                         |                          |         |                           |         |                               |         |
| 2007-8                       | -<br>(-, -)              | -       | -<br>(-, -)               | -       | -<br>(-, -)                   | -       |
| 2008-9                       | 0.12<br>(0.05,0.19)      | 0.001   | 0.58<br>(0.50,0.66)       | <0.001  | 0.26<br>(0.18,0.35)           | <0.001  |
| 2009-10                      | -0.26<br>(-0.33,-0.19)   | <0.001  | 0.04<br>(-0.03,0.12)      | 0.278   | -0.38<br>(-0.46,-0.29)        | <0.001  |
| 2010-11                      | 0.001<br>(-0.07,0.07)    | 0.976   | 0.29<br>(0.21,0.37)       | <0.001  | 0.03<br>(-0.06,0.11)          | 0.494   |
|                              |                          |         |                           |         |                               |         |
| List size (1000)             | -0.13<br>(-0.14,-0.12)   | <0.001  | -0.15<br>(-0.16,-0.14)    | <0.001  | 0.07<br>(0.06,0.08)           | <0.001  |
| IMD 2010 <sup>§</sup>        | -0.01<br>(-0.012,-0.008) | <0.001  | -0.017<br>(-0.019,-0.015) | <0.001  | -0.006<br>(-0.008,-0.003)     | <0.001  |

|                                             | Reported Achievement      |         | Population Achievement     |         | Percentage of points Achieved |         |
|---------------------------------------------|---------------------------|---------|----------------------------|---------|-------------------------------|---------|
|                                             | coeff (CI)                | p-value | coeff (CI)                 | p-value | coeff (CI)                    | p-value |
| Non-urban practice <sup>¶</sup>             | -0.14<br>(-0.21,-0.08)    | <0.001  | -0.04<br>(-0.11,0.04)      | 0.346   | -0.18<br>(-0.28,-0.08)        | 0.001   |
| GP contract                                 |                           |         |                            |         |                               |         |
| General Medical Services                    | -<br>(-, -)               | -       | -<br>(-, -)                | -       | -<br>(-, -)                   | -       |
| Personal Medical Services                   | 0.19<br>(0.13,0.24)       | <0.001  | 0.08<br>(0.02,0.14)        | 0.015   | 0.23<br>(0.16,0.30)           | <0.001  |
| Alternative Provider Medical Services       | -0.63<br>(-0.93,-0.34)    | <0.001  | -2.30<br>(-2.59,-2.01)     | <0.001  | -2.70<br>(-2.96,-2.44)        | <0.001  |
| Primary Care Trust Medical Services         | -1.46<br>(-1.82,-1.11)    | <0.001  | -2.38<br>(-2.73,-2.03)     | <0.001  | -2.51<br>(-2.85,-2.17)        | <0.001  |
| Practice % female patients                  | 0.10<br>(0.08,0.12)       | <0.001  | 0.07<br>(0.04,0.09)        | <0.001  | 0.23<br>(0.22,0.25)           | <0.001  |
| Practice % patients 65 or over              | -0.023<br>(-0.029,-0.016) | <0.001  | 0.052<br>(0.045,0.059)     | <0.001  | 0.05<br>(0.04,0.06)           | <0.001  |
| Practice mean General Practitioner (GP) age | -0.014<br>(-0.020,-0.009) | <0.001  | -0.014<br>(-0.020,-0.009)  | <0.001  | -0.061<br>(-0.067,-0.056)     | <0.001  |
| Practice % female GPs                       | 0.006<br>(0.005,0.007)    | <0.001  | 0.005<br>(0.004,0.007)     | <0.001  | 0.008<br>(0.007,0.010)        | <0.001  |
| Practice % of GPs qualified in the UK       | 0.001<br>(0.0002,0.002)   | 0.018   | -0.001<br>(-0.002,-0.0003) | 0.015   | 0.002<br>(0.001,0.003)        | 0.004   |
| Practice % of GP providers <sup>¶¶</sup>    | 0.007<br>(0.006,0.008)    | <0.001  | 0.011<br>(0.009,0.012)     | <0.001  | 0.01<br>(0.009,0.012)         | <0.001  |

\*Note that due to the modelled interaction all reported main effects relate to the measurement indicator group only, i.e. the comparison group (except for the indicator category effect)

† Overall, statistically significant differences between clinical systems were observed within each indicator group for each of the regressions (p<0.001 in all 9 chi<sup>2</sup> tests)

‡ The coefficients for the interactions represent the changes in the treatment and outcome indicator group, for each clinical system, compared to the measurement indicator group

§ Index of Multiple Deprivation at the Lower Super Output Area level

¶ Area classed as urban if population at the Middle Super Output Area level is 10,000 or more. Non-urban areas cover towns, fringes, villages, hamlets and isolated dwellings.

¶¶ General practitioners that has had at least 5 years in training as a foundation doctors and specialty registrars

**Table A-3: Pairwise comparisons on Reported Achievement levels across systems, using predictions from regression models, with confidence intervals adjusted using Scheffe’s method for multiple comparisons**

| <i>Overall (62 indicators)</i>     |      |                        |                      |                       |                      |                      |                      |                     |     |
|------------------------------------|------|------------------------|----------------------|-----------------------|----------------------|----------------------|----------------------|---------------------|-----|
| Product                            | rank | Predictions (CI)       | Pairwise comparisons |                       |                      |                      |                      |                     |     |
|                                    |      |                        | Vision 3             | Practice Manager      | Synergy              | Premiere             | ProdSysOneX          | LV                  | PCS |
| Vision 3                           | 1    | 90.12<br>(90.03,90.21) | -                    |                       |                      |                      |                      |                     |     |
| Practice Manager                   | 2    | 89.82<br>(89.52,90.13) | 0.30<br>(-0.27,0.87) | -                     |                      |                      |                      |                     |     |
| Synergy                            | 3    | 89.82<br>(89.70,89.94) | 0.30<br>(0.04,0.57)  | 0.005<br>(-0.59,0.60) | -                    |                      |                      |                     |     |
| Premiere                           | 4    | 89.79<br>(89.54,90.04) | 0.33<br>(-0.14,0.81) | 0.04<br>(-0.67,0.74)  | 0.03<br>(-0.47,0.53) | -                    |                      |                     |     |
| ProdSysOneX                        | 5    | 89.57<br>(89.44,89.69) | 0.55<br>(0.27,0.84)  | 0.26<br>(-0.34,0.85)  | 0.25<br>(-0.06,0.57) | 0.22<br>(-0.28,0.72) | -                    |                     |     |
| LV                                 | 6    | 89.40<br>(89.35,89.46) | 0.72<br>(0.52,0.92)  | 0.42<br>(-0.14,0.98)  | 0.42<br>(0.18,0.65)  | 0.38<br>(-0.07,0.84) | 0.16<br>(-0.09,0.42) | -                   |     |
| PCS                                | 7    | 88.68<br>(88.58,88.78) | 1.44<br>(1.20,1.69)  | 1.14<br>(0.57,1.71)   | 1.14<br>(0.86,1.42)  | 1.11<br>(0.63,1.59)  | 0.89<br>(0.59,1.19)  | 0.72<br>(0.52,0.93) | -   |
| <i>Measurement (35 indicators)</i> |      |                        |                      |                       |                      |                      |                      |                     |     |
| Product                            | rank | Predictions (CI)       | Pairwise comparisons |                       |                      |                      |                      |                     |     |
|                                    |      |                        | Vision 3             | Synergy               | Premiere             | Practice Manager     | LV                   | ProdSysOneX         | PCS |
| Vision 3                           | 1    | 93.48<br>(93.40,93.57) | -                    |                       |                      |                      |                      |                     |     |
| Synergy                            | 2    | 93.40<br>(93.29,93.52) | 0.08<br>(-0.33,0.49) | -                     |                      |                      |                      |                     |     |
| Premiere                           | 3    | 93.26<br>(93.03,93.48) | 0.23<br>(-0.47,0.92) | 0.15<br>(-0.57,0.86)  | -                    |                      |                      |                     |     |
| Practice Manager                   | 4    | 93.14<br>(92.87,93.41) | 0.35<br>(-0.48,1.17) | 0.27<br>(-0.58,1.11)  | 0.12<br>(-0.86,1.10) | -                    |                      |                     |     |
| LV                                 | 5    | 92.97<br>(92.92,93.02) | 0.51<br>(0.23,0.80)  | 0.43<br>(0.08,0.79)   | 0.29<br>(-0.38,0.95) | 0.17<br>(-0.62,0.95) | -                    |                     |     |

|                                  |      |                        |                      |                      |                      |                      |                      |                      |     |
|----------------------------------|------|------------------------|----------------------|----------------------|----------------------|----------------------|----------------------|----------------------|-----|
| ProdSysOneX                      | 6    | 92.91<br>(92.81,93.02) | 0.57<br>(0.16,0.98)  | 0.49<br>(0.04,0.94)  | 0.34<br>(-0.38,1.06) | 0.22<br>(-0.61,1.06) | 0.06<br>(-0.28,0.39) | -                    |     |
| PCS                              | 7    | 92.32<br>(92.21,92.43) | 1.16<br>(0.78,1.55)  | 1.08<br>(0.63,1.53)  | 0.94<br>(0.22,1.65)  | 0.82<br>(-0.02,1.65) | 0.65<br>(0.31,0.98)  | 0.59<br>(0.15,1.03)  | -   |
| <i>Treatment (11 indicators)</i> |      |                        |                      |                      |                      |                      |                      |                      |     |
| Product                          | rank | Predictions<br>(CI)    | Pairwise comparisons |                      |                      |                      |                      |                      |     |
|                                  |      |                        | Vision 3             | ProdSysOneX          | LV                   | Practice<br>Manager  | Synergy              | Premiere             | PCS |
| Vision 3                         | 1    | 90.63<br>(90.53,90.74) | -                    |                      |                      |                      |                      |                      |     |
| ProdSysOneX                      | 2    | 90.43<br>(90.31,90.56) | 0.20<br>(-0.27,0.67) | -                    |                      |                      |                      |                      |     |
| LV                               | 3    | 90.40<br>(90.34,90.46) | 0.23<br>(-0.11,0.58) | 0.03<br>(-0.37,0.44) | -                    |                      |                      |                      |     |
| Practice Manager                 | 4    | 90.22<br>(89.91,90.52) | 0.41<br>(-0.50,1.33) | 0.22<br>(-0.74,1.17) | 0.18<br>(-0.71,1.07) | -                    |                      |                      |     |
| Synergy                          | 5    | 90.19<br>(90.06,90.33) | 0.44<br>(-0.04,0.92) | 0.24<br>(-0.27,0.76) | 0.21<br>(-0.20,0.61) | 0.03<br>(-0.92,0.97) | -                    |                      |     |
| Premiere                         | 6    | 89.82<br>(89.54,90.09) | 0.81<br>(-0.02,1.65) | 0.62<br>(-0.25,1.48) | 0.58<br>(-0.22,1.38) | 0.40<br>(-0.78,1.58) | 0.37<br>(-0.50,1.24) | -                    |     |
| PCS                              | 7    | 89.42<br>(89.30,89.54) | 1.21<br>(0.76,1.67)  | 1.01<br>(0.51,1.51)  | 0.98<br>(0.60,1.36)  | 0.80<br>(-0.13,1.73) | 0.77<br>(0.25,1.29)  | 0.40<br>(-0.44,1.24) | -   |
| <i>Outcome (16 indicators)</i>   |      |                        |                      |                      |                      |                      |                      |                      |     |
| Product                          | rank | Predictions<br>(CI)    | Pairwise comparisons |                      |                      |                      |                      |                      |     |
|                                  |      |                        | Practice<br>Manager  | Vision 3             | Premiere             | Synergy              | ProdSysOneX          | LV                   | PCS |
| Practice Manager                 | 1    | 81.36<br>(80.99,81.74) | -                    |                      |                      |                      |                      |                      |     |
| Vision 3                         | 2    | 81.03<br>(80.91,81.15) | 0.33<br>(-0.80,1.47) | -                    |                      |                      |                      |                      |     |
| Premiere                         | 3    | 80.73<br>(80.37,81.08) | 0.64<br>(-0.81,2.08) | 0.30<br>(-0.79,1.40) | -                    |                      |                      |                      |     |
| Synergy                          | 4    | 80.41<br>(80.23,80.59) | 0.95<br>(-0.23,2.13) | 0.62<br>(-0.01,1.25) | 0.32<br>(-0.80,1.44) | -                    |                      |                      |     |
| ProdSysOneX                      | 5    | 80.31                  | 1.05                 | 0.72                 | 0.42                 | 0.10                 | -                    |                      |     |

|     |   |                        |                     |                     |                     |                     |                     |                     |   |
|-----|---|------------------------|---------------------|---------------------|---------------------|---------------------|---------------------|---------------------|---|
|     |   | (80.15,80.46)          | (-0.14,2.25)        | (0.15,1.29)         | (-0.67,1.50)        | (-0.59,0.79)        |                     |                     |   |
| LV  | 6 | 79.53<br>(79.46,79.60) | 1.83<br>(0.74,2.92) | 1.50<br>(1.09,1.91) | 1.20<br>(0.17,2.23) | 0.88<br>(0.33,1.43) | 0.78<br>(0.29,1.27) | -                   |   |
| PCS | 7 | 78.67<br>(78.52,78.82) | 2.69<br>(1.52,3.86) | 2.36<br>(1.80,2.91) | 2.05<br>(0.98,3.13) | 1.74<br>(1.06,2.41) | 1.63<br>(1.02,2.25) | 0.86<br>(0.39,1.32) | - |



**Table A-4: Pairwise comparisons on Population Achievement levels across systems, using predictions from regression models, with confidence intervals adjusted using Scheffe's method for multiple comparisons**

| <i>Overall (62 indicators)</i>     |      |                        |                      |                      |                      |                      |                      |                      |     |
|------------------------------------|------|------------------------|----------------------|----------------------|----------------------|----------------------|----------------------|----------------------|-----|
| Product                            | rank | Predictions<br>(CI)    | Pairwise comparisons |                      |                      |                      |                      |                      |     |
|                                    |      |                        | Synergy              | Vision 3             | Premiere             | LV                   | Practice Manager     | ProdSysOneX          | PCS |
| Synergy                            | 1    | 85.57<br>(85.43,85.72) | -                    |                      |                      |                      |                      |                      |     |
| Vision 3                           | 2    | 85.39<br>(85.29,85.49) | 0.19<br>(-0.11,0.49) | -                    |                      |                      |                      |                      |     |
| Premiere                           | 3    | 85.07<br>(84.81,85.33) | 0.50<br>(-0.03,1.04) | 0.32<br>(-0.19,0.83) | -                    |                      |                      |                      |     |
| LV                                 | 4    | 85.04<br>(84.98,85.10) | 0.54<br>(0.26,0.81)  | 0.35<br>(0.14,0.56)  | 0.03<br>(-0.45,0.52) | -                    |                      |                      |     |
| Practice Manager                   | 5    | 84.71<br>(84.38,85.03) | 0.86<br>(0.23,1.50)  | 0.68<br>(0.07,1.29)  | 0.36<br>(-0.38,1.10) | 0.33<br>(-0.27,0.93) | -                    |                      |     |
| ProdSysOneX                        | 6    | 84.52<br>(84.40,84.64) | 1.05<br>(0.71,1.40)  | 0.87<br>(0.57,1.16)  | 0.55<br>(0.04,1.06)  | 0.52<br>(0.26,0.77)  | 0.19<br>(-0.44,0.82) | -                    |     |
| PCS                                | 7    | 84.28<br>(84.17,84.39) | 1.30<br>(0.98,1.61)  | 1.11<br>(0.84,1.38)  | 0.79<br>(0.29,1.29)  | 0.76<br>(0.53,0.99)  | 0.43<br>(-0.19,1.05) | 0.24<br>(-0.06,0.55) | -   |
| <i>Measurement (35 indicators)</i> |      |                        |                      |                      |                      |                      |                      |                      |     |
| Product                            | rank | Predictions<br>(CI)    | Pairwise comparisons |                      |                      |                      |                      |                      |     |
|                                    |      |                        | Synergy              | Vision 3             | Premiere             | LV                   | Practice Manager     | ProdSysOneX          | PCS |
| Synergy                            | 1    | 90.87<br>(90.74,91.01) | -                    |                      |                      |                      |                      |                      |     |
| Vision 3                           | 2    | 90.62<br>(90.52,90.72) | 0.25<br>(-0.23,0.73) | -                    |                      |                      |                      |                      |     |
| Premiere                           | 3    | 90.39<br>(90.15,90.64) | 0.48<br>(-0.31,1.27) | 0.23<br>(-0.51,0.96) | -                    |                      |                      |                      |     |
| LV                                 | 4    | 90.36<br>(90.30,90.42) | 0.51<br>(0.09,0.93)  | 0.26<br>(-0.08,0.60) | 0.03<br>(-0.69,0.75) | -                    |                      |                      |     |
| Practice Manager                   | 5    | 90.04<br>(89.74,90.34) | 0.84<br>(-0.10,1.77) | 0.58<br>(-0.32,1.48) | 0.36<br>(-0.74,1.46) | 0.33<br>(-0.55,1.20) | -                    |                      |     |

|             |   |                        |                     |                     |                      |                     |                      |                      |   |
|-------------|---|------------------------|---------------------|---------------------|----------------------|---------------------|----------------------|----------------------|---|
| ProdSysOneX | 6 | 89.70<br>(89.58,89.82) | 1.17<br>(0.65,1.69) | 0.92<br>(0.47,1.37) | 0.69<br>(-0.07,1.46) | 0.66<br>(0.28,1.04) | 0.33<br>(-0.61,1.27) | -                    |   |
| PCS         | 7 | 89.56<br>(89.45,89.67) | 1.31<br>(0.83,1.80) | 1.06<br>(0.64,1.48) | 0.84<br>(0.10,1.57)  | 0.81<br>(0.45,1.16) | 0.48<br>(-0.44,1.39) | 0.14<br>(-0.33,0.62) | - |

*Treatment (11 indicators)*

| Product          | rank | Predictions<br>(CI)    | Pairwise comparisons |                      |                      |                      |                      |                      |                  |
|------------------|------|------------------------|----------------------|----------------------|----------------------|----------------------|----------------------|----------------------|------------------|
|                  |      |                        | LV                   | Vision 3             | Synergy              | ProdSysOneX          | PCS                  | Premiere             | Practice Manager |
| LV               | 1    | 80.96<br>(80.90,81.03) | -                    |                      |                      |                      |                      |                      |                  |
| Vision 3         | 2    | 80.92<br>(80.82,81.03) | 0.04<br>(-0.31,0.39) | -                    |                      |                      |                      |                      |                  |
| Synergy          | 3    | 80.88<br>(80.72,81.03) | 0.09<br>(-0.39,0.56) | 0.05<br>(-0.48,0.57) | -                    |                      |                      |                      |                  |
| ProdSysOneX      | 4    | 80.45<br>(80.33,80.57) | 0.51<br>(0.10,0.92)  | 0.48<br>(0.00,0.95)  | 0.43<br>(-0.13,0.99) | -                    |                      |                      |                  |
| PCS              | 5    | 80.41<br>(80.28,80.53) | 0.56<br>(0.18,0.94)  | 0.52<br>(0.06,0.98)  | 0.47<br>(-0.08,1.02) | 0.04<br>(-0.45,0.54) | -                    |                      |                  |
| Premiere         | 6    | 80.14<br>(79.86,80.42) | 0.82<br>(0.00,1.64)  | 0.78<br>(-0.07,1.64) | 0.73<br>(-0.17,1.64) | 0.31<br>(-0.57,1.18) | 0.26<br>(-0.62,1.14) | -                    |                  |
| Practice Manager | 7    | 80.01<br>(79.69,80.32) | 0.96<br>(0.05,1.86)  | 0.92<br>(-0.03,1.86) | 0.87<br>(-0.14,1.88) | 0.44<br>(-0.52,1.41) | 0.40<br>(-0.55,1.35) | 0.14<br>(-1.05,1.32) | -                |

*Outcome (16 indicators)*

| Product          | rank | Predictions<br>(CI)    | Pairwise comparisons |                      |                      |          |    |             |     |
|------------------|------|------------------------|----------------------|----------------------|----------------------|----------|----|-------------|-----|
|                  |      |                        | Synergy              | Vision 3             | Practice Manager     | Premiere | LV | ProdSysOneX | PCS |
| Synergy          | 1    | 75.42<br>(75.21,75.63) | -                    |                      |                      |          |    |             |     |
| Vision 3         | 2    | 75.28<br>(75.15,75.41) | 0.14<br>(-0.54,0.83) | -                    |                      |          |    |             |     |
| Practice Manager | 3    | 75.04<br>(74.64,75.44) | 0.37<br>(-0.90,1.65) | 0.23<br>(-0.97,1.43) | -                    |          |    |             |     |
| Premiere         | 4    | 74.92<br>(74.57,75.28) | 0.50<br>(-0.69,1.69) | 0.35<br>(-0.73,1.44) | 0.12<br>(-1.43,1.68) | -        |    |             |     |
| LV               | 5    | 74.31                  | 1.10                 | 0.96                 | 0.73                 | 0.61     | -  |             |     |

|             |   |                        |                     |                     |                      |                      |                      |                     |   |
|-------------|---|------------------------|---------------------|---------------------|----------------------|----------------------|----------------------|---------------------|---|
|             |   | (74.23,74.39)          | (0.47,1.74)         | (0.53,1.40)         | (-0.43,1.89)         | (-0.44,1.66)         |                      |                     |   |
| ProdSysOneX | 6 | 74.05<br>(73.88,74.22) | 1.37<br>(0.57,2.17) | 1.23<br>(0.61,1.84) | 1.00<br>(-0.24,2.23) | 0.87<br>(-0.27,2.02) | 0.27<br>(-0.27,0.80) | -                   |   |
| PCS         | 7 | 73.34<br>(73.19,73.50) | 2.07<br>(1.32,2.82) | 1.93<br>(1.35,2.51) | 1.70<br>(0.48,2.92)  | 1.58<br>(0.48,2.67)  | 0.97<br>(0.47,1.47)  | 0.70<br>(0.06,1.35) | - |

**Table A-5: Pairwise comparisons on % of Points Achieved across systems, using predictions from regression models, with confidence intervals adjusted using Scheffe's method for multiple comparisons**

| <i>Overall (62 indicators)</i>     |      |                        |                      |                      |                      |                      |                      |                      |                  |
|------------------------------------|------|------------------------|----------------------|----------------------|----------------------|----------------------|----------------------|----------------------|------------------|
| Product                            | rank | Predictions (CI)       | Pairwise comparisons |                      |                      |                      |                      |                      |                  |
|                                    |      |                        | Synergy              | Premiere             | Vision 3             | LV                   | ProdSysOneX          | Practice Manager     | PCS              |
| Synergy                            | 1    | 98.08<br>(97.93,98.23) | -                    |                      |                      |                      |                      |                      |                  |
| Premiere                           | 2    | 98.07<br>(97.75,98.38) | 0.01<br>(-0.61,0.63) | -                    |                      |                      |                      |                      |                  |
| Vision 3                           | 3    | 97.81<br>(97.69,97.92) | 0.27<br>(-0.05,0.60) | 0.26<br>(-0.35,0.87) | -                    |                      |                      |                      |                  |
| LV                                 | 4    | 97.70<br>(97.63,97.77) | 0.38<br>(0.11,0.65)  | 0.37<br>(-0.20,0.93) | 0.10<br>(-0.15,0.36) | -                    |                      |                      |                  |
| ProdSysOneX                        | 5    | 97.59<br>(97.45,97.73) | 0.49<br>(0.14,0.84)  | 0.48<br>(-0.14,1.09) | 0.21<br>(-0.12,0.55) | 0.11<br>(-0.18,0.40) | -                    |                      |                  |
| Practice Manager                   | 6    | 97.36<br>(96.98,97.75) | 0.72<br>(-0.02,1.45) | 0.70<br>(-0.18,1.59) | 0.44<br>(-0.28,1.17) | 0.34<br>(-0.36,1.04) | 0.23<br>(-0.50,0.96) | -                    |                  |
| PCS                                | 7    | 97.30<br>(97.17,97.44) | 0.78<br>(0.42,1.13)  | 0.77<br>(0.15,1.38)  | 0.50<br>(0.18,0.83)  | 0.40<br>(0.13,0.67)  | 0.29<br>(-0.07,0.65) | 0.06<br>(-0.67,0.79) | -                |
| <i>Measurement (35 indicators)</i> |      |                        |                      |                      |                      |                      |                      |                      |                  |
| Product                            | rank | Predictions (CI)       | Pairwise comparisons |                      |                      |                      |                      |                      |                  |
|                                    |      |                        | Synergy              | Premiere             | LV                   | Vision 3             | ProdSysOneX          | PCS                  | Practice Manager |
| Synergy                            | 1    | 98.00<br>(97.70,98.31) | -                    |                      |                      |                      |                      |                      |                  |
| Premiere                           | 2    | 97.75<br>(97.35,98.15) | 0.25<br>(-0.90,1.40) | -                    |                      |                      |                      |                      |                  |
| LV                                 | 3    | 97.36<br>(97.14,97.59) | 0.64<br>(-0.02,1.30) | 0.39<br>(-0.61,1.38) | -                    |                      |                      |                      |                  |

|                                  |      |                        |                         |                      |                      |                      |                      |                      |                     |  |
|----------------------------------|------|------------------------|-------------------------|----------------------|----------------------|----------------------|----------------------|----------------------|---------------------|--|
| Vision 3                         | 4    | 97.27<br>(97.03,97.52) | 0.73<br>(0.01,1.44)     | 0.48<br>(-0.55,1.51) | 0.09<br>(-0.33,0.51) | -                    |                      |                      |                     |  |
| ProdSysOneX                      | 5    | 97.22<br>(96.96,97.49) | 0.78<br>(0.01,1.55)     | 0.53<br>(-0.54,1.60) | 0.14<br>(-0.37,0.65) | 0.05<br>(-0.53,0.64) | -                    |                      |                     |  |
| PCS                              | 6    | 96.88<br>(96.62,97.13) | 1.12<br>(0.38,1.86)     | 0.87<br>(-0.18,1.92) | 0.48<br>(0.02,0.95)  | 0.40<br>(-0.14,0.93) | 0.34<br>(-0.27,0.95) | -                    |                     |  |
| Practice Manager                 | 7    | 96.83<br>(96.39,97.28) | 1.17<br>(-0.12,2.45)    | 0.92<br>(-0.57,2.41) | 0.53<br>(-0.62,1.68) | 0.44<br>(-0.74,1.62) | 0.39<br>(-0.83,1.61) | 0.05<br>(-1.15,1.24) | -                   |  |
| <i>Treatment (11 indicators)</i> |      |                        |                         |                      |                      |                      |                      |                      |                     |  |
|                                  |      |                        | Pairwise comparisons    |                      |                      |                      |                      |                      |                     |  |
| Product                          | rank | Predictions<br>(CI)    | Premiere                | Synergy              | LV                   | Vision 3             | ProdSysOneX          | PCS                  | Practice<br>Manager |  |
| Premiere                         | 1    | 98.44<br>(98.04,98.84) | -                       |                      |                      |                      |                      |                      |                     |  |
| Synergy                          | 2    | 98.44<br>(98.14,98.74) | -0.002<br>(-1.152,1.49) | -                    |                      |                      |                      |                      |                     |  |
| LV                               | 3    | 98.39<br>(98.16,98.62) | 0.05<br>(-0.94,1.05)    | 0.05<br>(-0.61,0.71) | -                    |                      |                      |                      |                     |  |
| Vision 3                         | 4    | 98.27<br>(98.02,98.52) | 0.17<br>(-0.86,1.20)    | 0.17<br>(-0.55,0.89) | 0.12<br>(-0.31,0.54) | -                    |                      |                      |                     |  |
| ProdSysOneX                      | 5    | 98.07<br>(97.81,98.34) | 0.37<br>(-0.71,1.44)    | 0.37<br>(-0.41,1.14) | 0.31<br>(-0.20,0.83) | 0.20<br>(-0.39,0.78) | -                    |                      |                     |  |
| PCS                              | 6    | 98.01<br>(97.75,98.26) | 0.44<br>(-0.61,1.48)    | 0.43<br>(-0.31,1.17) | 0.38<br>(-0.08,0.84) | 0.26<br>(-0.27,0.80) | 0.07<br>(-0.54,0.68) | -                    |                     |  |
| Practice Manager                 | 7    | 97.50<br>(97.05,97.95) | 0.94<br>(-0.54,2.43)    | 0.94<br>(-0.34,2.23) | 0.89<br>(-0.26,2.04) | 0.77<br>(-0.41,1.95) | 0.58<br>(-0.65,1.80) | 0.51<br>(-0.69,1.71) | -                   |  |
| <i>Outcome (16 indicators)</i>   |      |                        |                         |                      |                      |                      |                      |                      |                     |  |
|                                  |      |                        | Pairwise comparisons    |                      |                      |                      |                      |                      |                     |  |
| Product                          | rank | Predictions<br>(CI)    | Vision 3                | Premiere             | Practice<br>Manager  | Synergy              | ProdSysOneX          | LV                   | PCS                 |  |
| Vision 3                         | 1    | 98.32                  | -                       |                      |                      |                      |                      |                      |                     |  |

|                  |   |                        |                      |                      |                      |                      |                      |                      |   |
|------------------|---|------------------------|----------------------|----------------------|----------------------|----------------------|----------------------|----------------------|---|
|                  |   | (98.07,98.57)          |                      |                      |                      |                      |                      |                      |   |
| Premiere         | 2 | 98.27<br>(97.87,98.67) | 0.05<br>(-0.98,1.08) | -                    |                      |                      |                      |                      |   |
| Practice Manager | 3 | 98.21<br>(97.77,98.66) | 0.10<br>(-1.08,1.29) | 0.06<br>(-1.43,1.54) | -                    |                      |                      |                      |   |
| Synergy          | 4 | 98.04<br>(97.74,98.35) | 0.27<br>(-0.44,0.99) | 0.23<br>(-0.93,1.38) | 0.17<br>(-1.11,1.45) | -                    |                      |                      |   |
| ProdSysOneX      | 5 | 97.80<br>(97.54,98.07) | 0.52<br>(-0.07,1.10) | 0.47<br>(-0.61,1.54) | 0.41<br>(-0.81,1.63) | 0.24<br>(-0.53,1.01) | -                    |                      |   |
| LV               | 6 | 97.76<br>(97.53,97.98) | 0.56<br>(0.14,0.98)  | 0.51<br>(-0.48,1.51) | 0.46<br>(-0.69,1.61) | 0.29<br>(-0.37,0.95) | 0.05<br>(-0.47,0.56) | -                    |   |
| PCS              | 7 | 97.39<br>(97.14,97.65) | 0.92<br>(0.39,1.46)  | 0.88<br>(-0.17,1.92) | 0.82<br>(-0.38,2.02) | 0.65<br>(-0.09,1.39) | 0.41<br>(-0.20,1.02) | 0.36<br>(-0.10,0.82) | - |

Table A-6: Quality and Outcomes Framework indicators included in the main analysis

| Indicator | Min Threshold | Max Threshold | Points | Description                                                   | Type of indicator |
|-----------|---------------|---------------|--------|---------------------------------------------------------------|-------------------|
| AF 4      | 40            | 90            | 10     | Diagnosis confirmed by ECG or specialist                      | Measurement       |
| AF 3      | 40            | 90            | 15     | Treated with anti-coagulation/anti-platelet                   | Treatment         |
| ASTHMA 8  | 40            | 80            | 15     | Variability/reversibility measured                            | Measurement       |
| ASTHMA 3  | 40            | 80            | 6      | Smoking status recorded (ages 14-19)                          | Measurement       |
| ASTHMA 6  | 40            | 70            | 20     | Care reviewed                                                 | Measurement       |
| BP 4      | 40            | 90            | 20     | Blood pressure measured                                       | Measurement       |
| BP 5      | 40            | 70            | 57     | Last blood pressure $\leq$ 150/90 mmHg                        | Outcome           |
| CANCER 3  | 40            | 90            | 6      | Care reviewed                                                 | Measurement       |
| CHD 2     | 40            | 90            | 7      | Referred for exercise testing/specialist assessment           | Measurement       |
| CHD 5     | 40            | 90            | 7      | Blood pressure measured                                       | Measurement       |
| CHD 6     | 40            | 70            | 19     | Blood pressure $\leq$ 150/90 mmHg                             | Outcome           |
| CHD 7     | 40            | 90            | 7      | Total cholesterol measured                                    | Measurement       |
| CHD 8     | 40            | 70            | 17     | Total cholesterol $\leq$ 5 mmol/l                             | Outcome           |
| CHD 9     | 40            | 90            | 7      | Treated with aspirin/anti-platelet/anti-coagulant             | Treatment         |
| CHD 10    | 40            | 60            | 7      | Treated with beta blocker                                     | Treatment         |
| CHD 11    | 40            | 80            | 7      | Treated with ACE-inhibitor (history of myocardial infarction) | Treatment         |
| CHD 12    | 40            | 90            | 7      | Influenza vaccination                                         | Treatment         |
| HF 2      | 40            | 90            | 6      | Diagnosis confirmed by echocardiogram/specialist              | Measurement       |

|            |    |    |     |                                                                                        |             |
|------------|----|----|-----|----------------------------------------------------------------------------------------|-------------|
| HF 3       | 40 | 80 | 10  | Treated with ACE inhibitor/angiotensin receptor blocker                                | Treatment   |
| CKD 2      | 40 | 90 | 6   | Blood pressure measured                                                                | Measurement |
| CKD 3      | 40 | 70 | 11  | Blood pressure $\leq 140/85$ mmHg                                                      | Outcome     |
| CKD 5      | 40 | 80 | 4   | Treated with ACE inhibitor/angiotensin receptor blocker (hypertension and proteinuria) | Treatment   |
| COPD 12    | 40 | 80 | 5   | Diagnosis confirmed by post bronchodilator spirometry                                  | Measurement |
| COPD 10    | 40 | 70 | 7   | FeV1 measured                                                                          | Measurement |
| COPD 11/13 | 40 | 90 | 7/9 | Care reviewed                                                                          | Treatment   |
| COPD 8     | 40 | 85 | 6   | Influenza vaccination                                                                  | Treatment   |
| DEM 2      | 25 | 60 | 15  | Care reviewed                                                                          | Measurement |
| DEP 1      | 40 | 90 | 8/6 | Case finding on Diabetes and CHD register                                              | Measurement |
| DEP 2      | 40 | 90 | 25  | Severity assessed (start of treatment)                                                 | Measurement |
| DM 2       | 40 | 90 | 3   | BMI measured                                                                           | Measurement |
| DM 5       | 40 | 90 | 3   | HbA1c measured                                                                         | Measurement |
| DM20/23    | 40 | 50 | 17  | HbA1c $\leq 7/7.5\%$                                                                   | Outcome     |
| DM 7/25    | 40 | 90 | 11  | HbA1c $\leq 10/9\%$                                                                    | Outcome     |
| DM 21      | 40 | 90 | 5   | Retinal screening                                                                      | Measurement |
| DM 9       | 40 | 90 | 3   | Peripheral pulses assessed                                                             | Measurement |
| DM 10      | 40 | 90 | 3   | Neuropathy testing                                                                     | Measurement |
| DM 11      | 40 | 90 | 3   | Blood pressure measured                                                                | Measurement |
| DM 12      | 40 | 60 | 18  | Blood pressure $\leq 145/85$ mmHg                                                      | Outcome     |
| DM 13      | 40 | 90 | 3   | Micro-albuminuria testing                                                              | Measurement |



|            |    |    |    |                                                                               |             |
|------------|----|----|----|-------------------------------------------------------------------------------|-------------|
| DM 22      | 40 | 90 | 3  | Glomerular filtration rate/serum creatinine measured                          | Measurement |
| DM 15      | 40 | 80 | 3  | Treated with ACE inhibitors/A2 antagonists (proteinuria or micro-albuminuria) | Treatment   |
| DM 16      | 40 | 90 | 3  | Total cholesterol measured                                                    | Measurement |
| DM 17      | 40 | 70 | 6  | Total cholesterol $\leq$ 5 mmol/l                                             | Outcome     |
| DM 18      | 40 | 85 | 3  | Influenza vaccination                                                         | Treatment   |
| EPILEPSY 6 | 40 | 90 | 4  | Seizure frequency measured                                                    | Measurement |
| EPILEPSY 7 | 40 | 90 | 4  | Medication reviewed (ages 18 and over)                                        | Measurement |
| EPILEPSY 8 | 40 | 70 | 6  | Seizure free for last 12 months (ages 18 and over)                            | Outcome     |
| MH 9       | 40 | 90 | 23 | Care reviewed                                                                 | Measurement |
| MH 4       | 40 | 90 | 1  | Serum creatinine and TSH measured (on lithium)                                | Measurement |
| MH 5       | 40 | 90 | 2  | Lithium levels in the therapeutic range (on lithium)                          | Treatment   |
| MH 6       | 25 | 50 | 6  | Care plan documented                                                          | Treatment   |
| MH 7       | 40 | 90 | 3  | Followed up within 14 days (non-attenders)                                    | Measurement |
| SMOKING 3  | 40 | 90 | 33 | Smoking status recorded                                                       | Measurement |
| SMOKING 4  | 40 | 90 | 35 | Smoking cessation advice/intervention offered (smokers)                       | Treatment   |
| STROKE 13  | 40 | 80 | 2  | Referred for further investigation                                            | Measurement |
| STROKE 5   | 40 | 90 | 2  | Blood pressure measured                                                       | Measurement |
| STROKE 6   | 40 | 70 | 5  | Blood pressure $\leq$ 150/90 mmHg                                             | Outcome     |

|           |    |    |   |                                                              |             |
|-----------|----|----|---|--------------------------------------------------------------|-------------|
| STROKE 7  | 40 | 90 | 2 | Total cholesterol measured                                   | Measurement |
| STROKE 8  | 40 | 60 | 5 | Total cholesterol $\leq 5$ mmol/l                            | Outcome     |
| STROKE 12 | 40 | 90 | 4 | Treated with anti-platelet/anti-coagulant (non-haemorrhagic) | Treatment   |
| STROKE 10 | 40 | 85 | 2 | Influenza vaccination                                        | Treatment   |
| THYROID 2 | 40 | 90 | 6 | Thyroid function measured                                    | Measurement |

Figure A-1

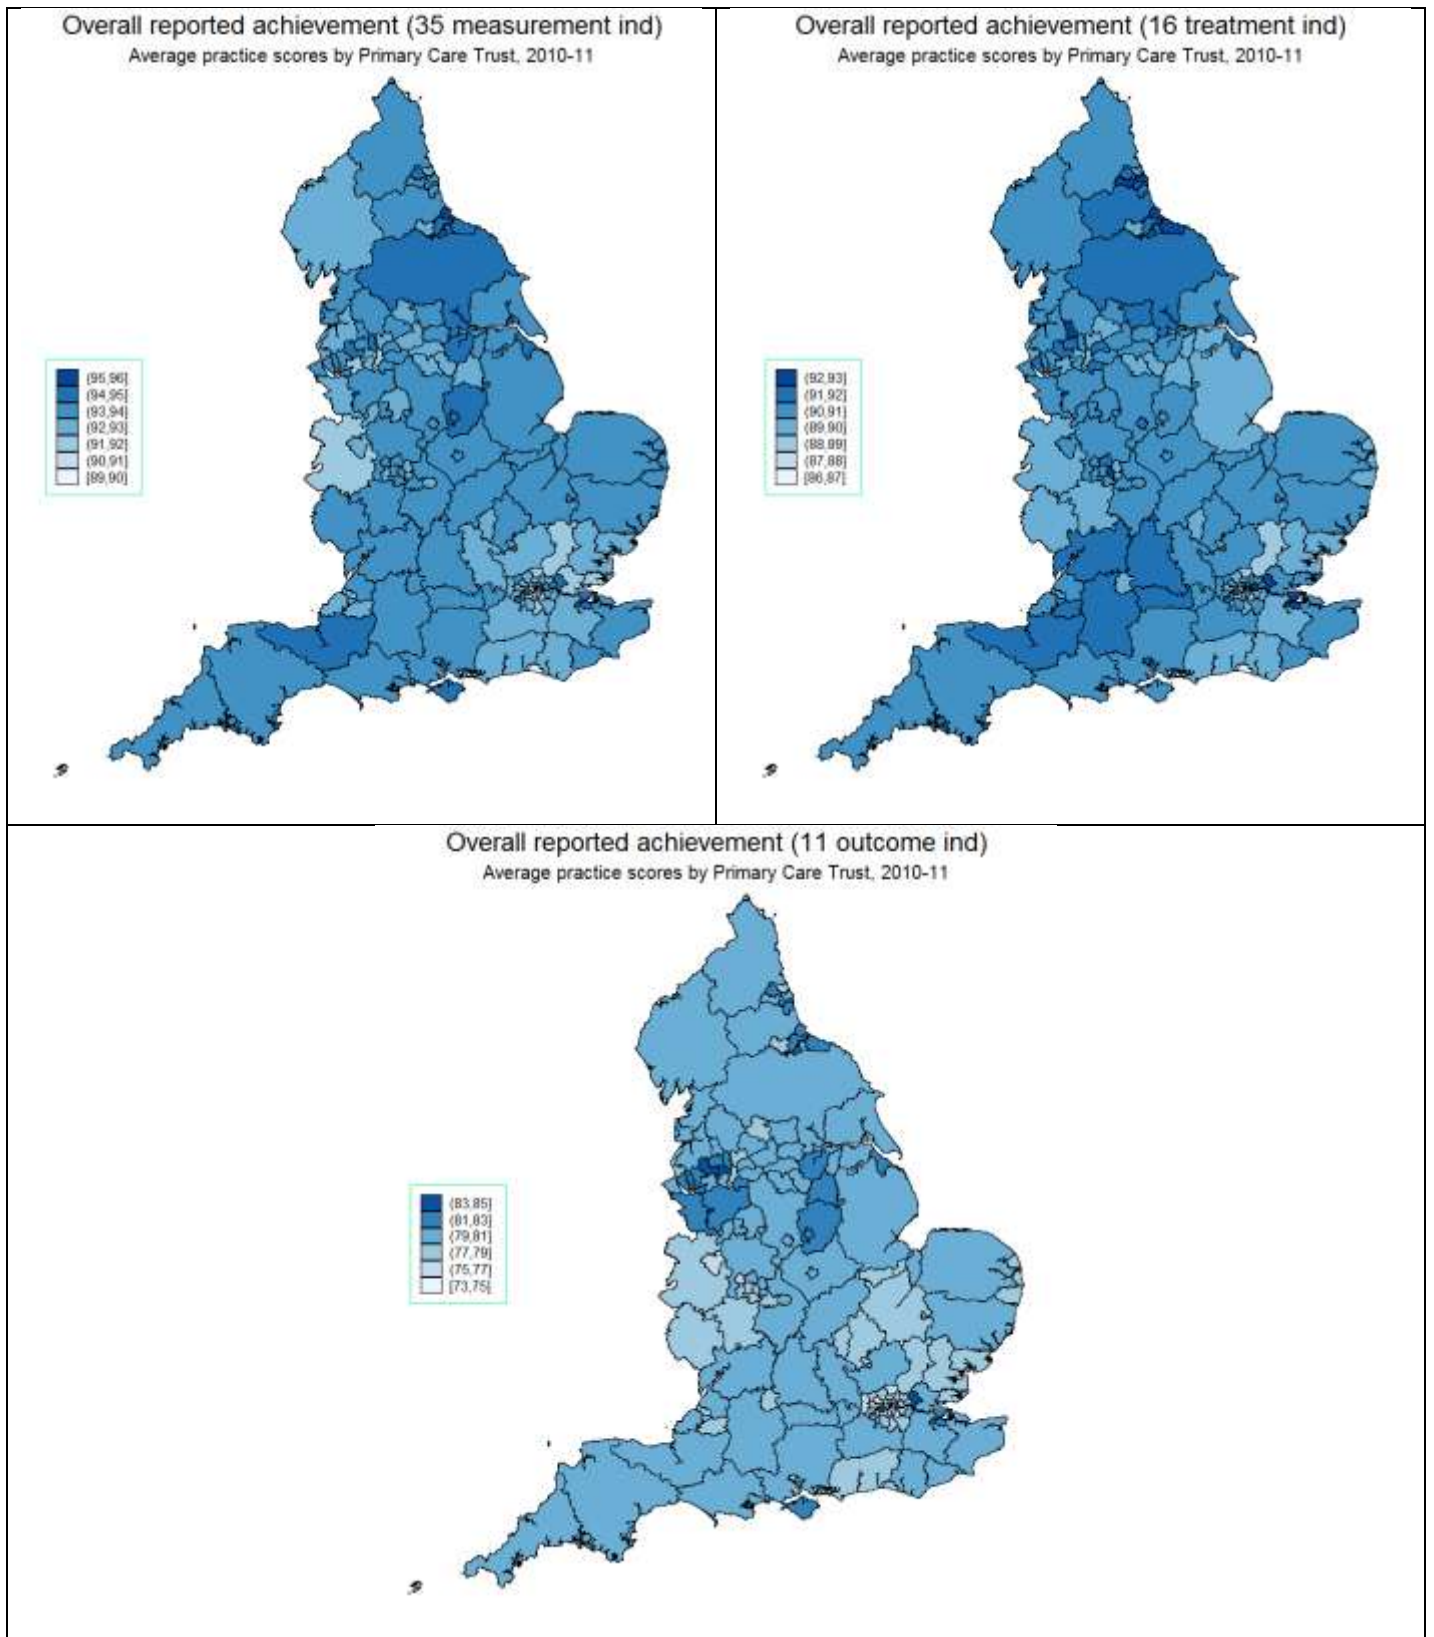

Figure A-2

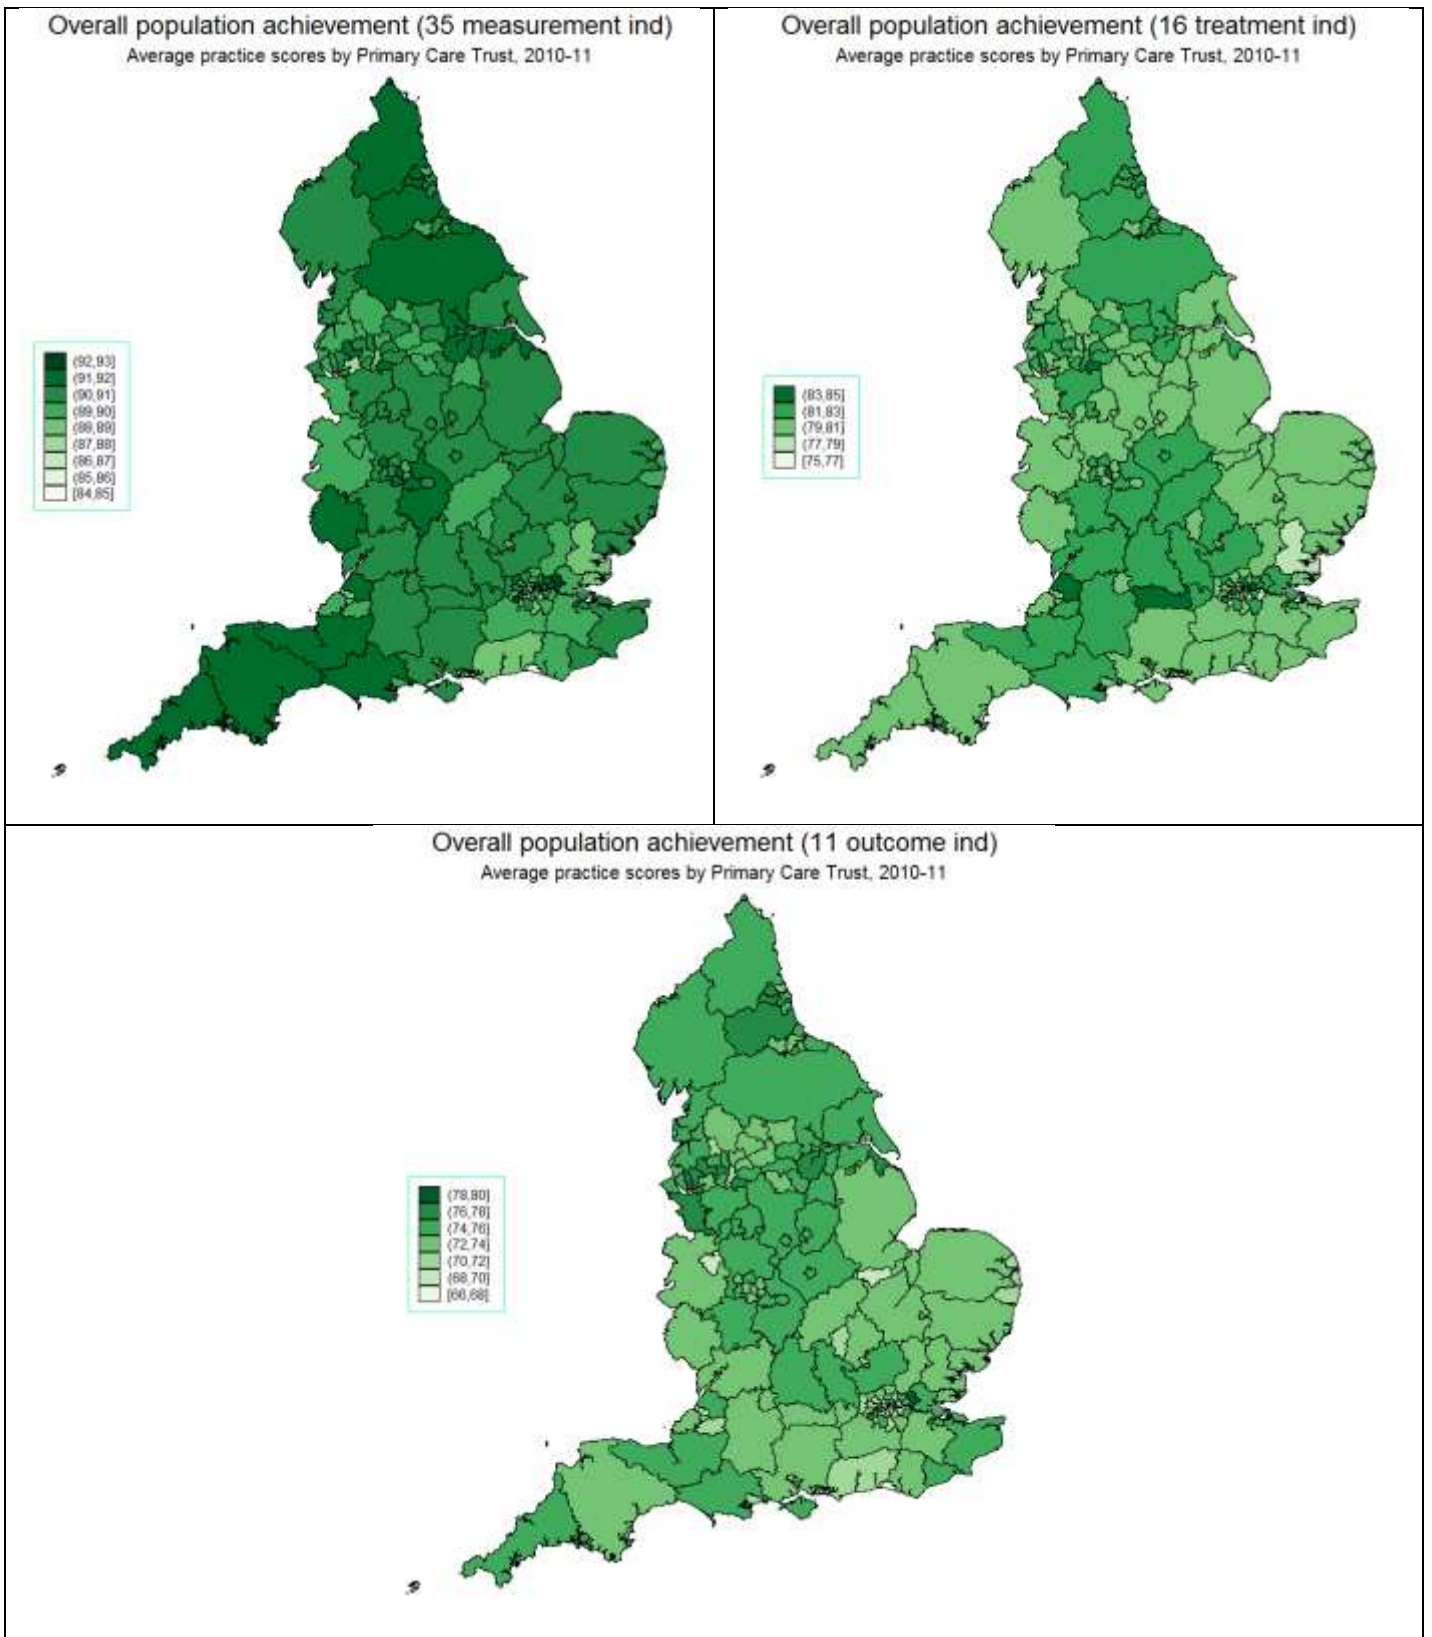

Figure A-3

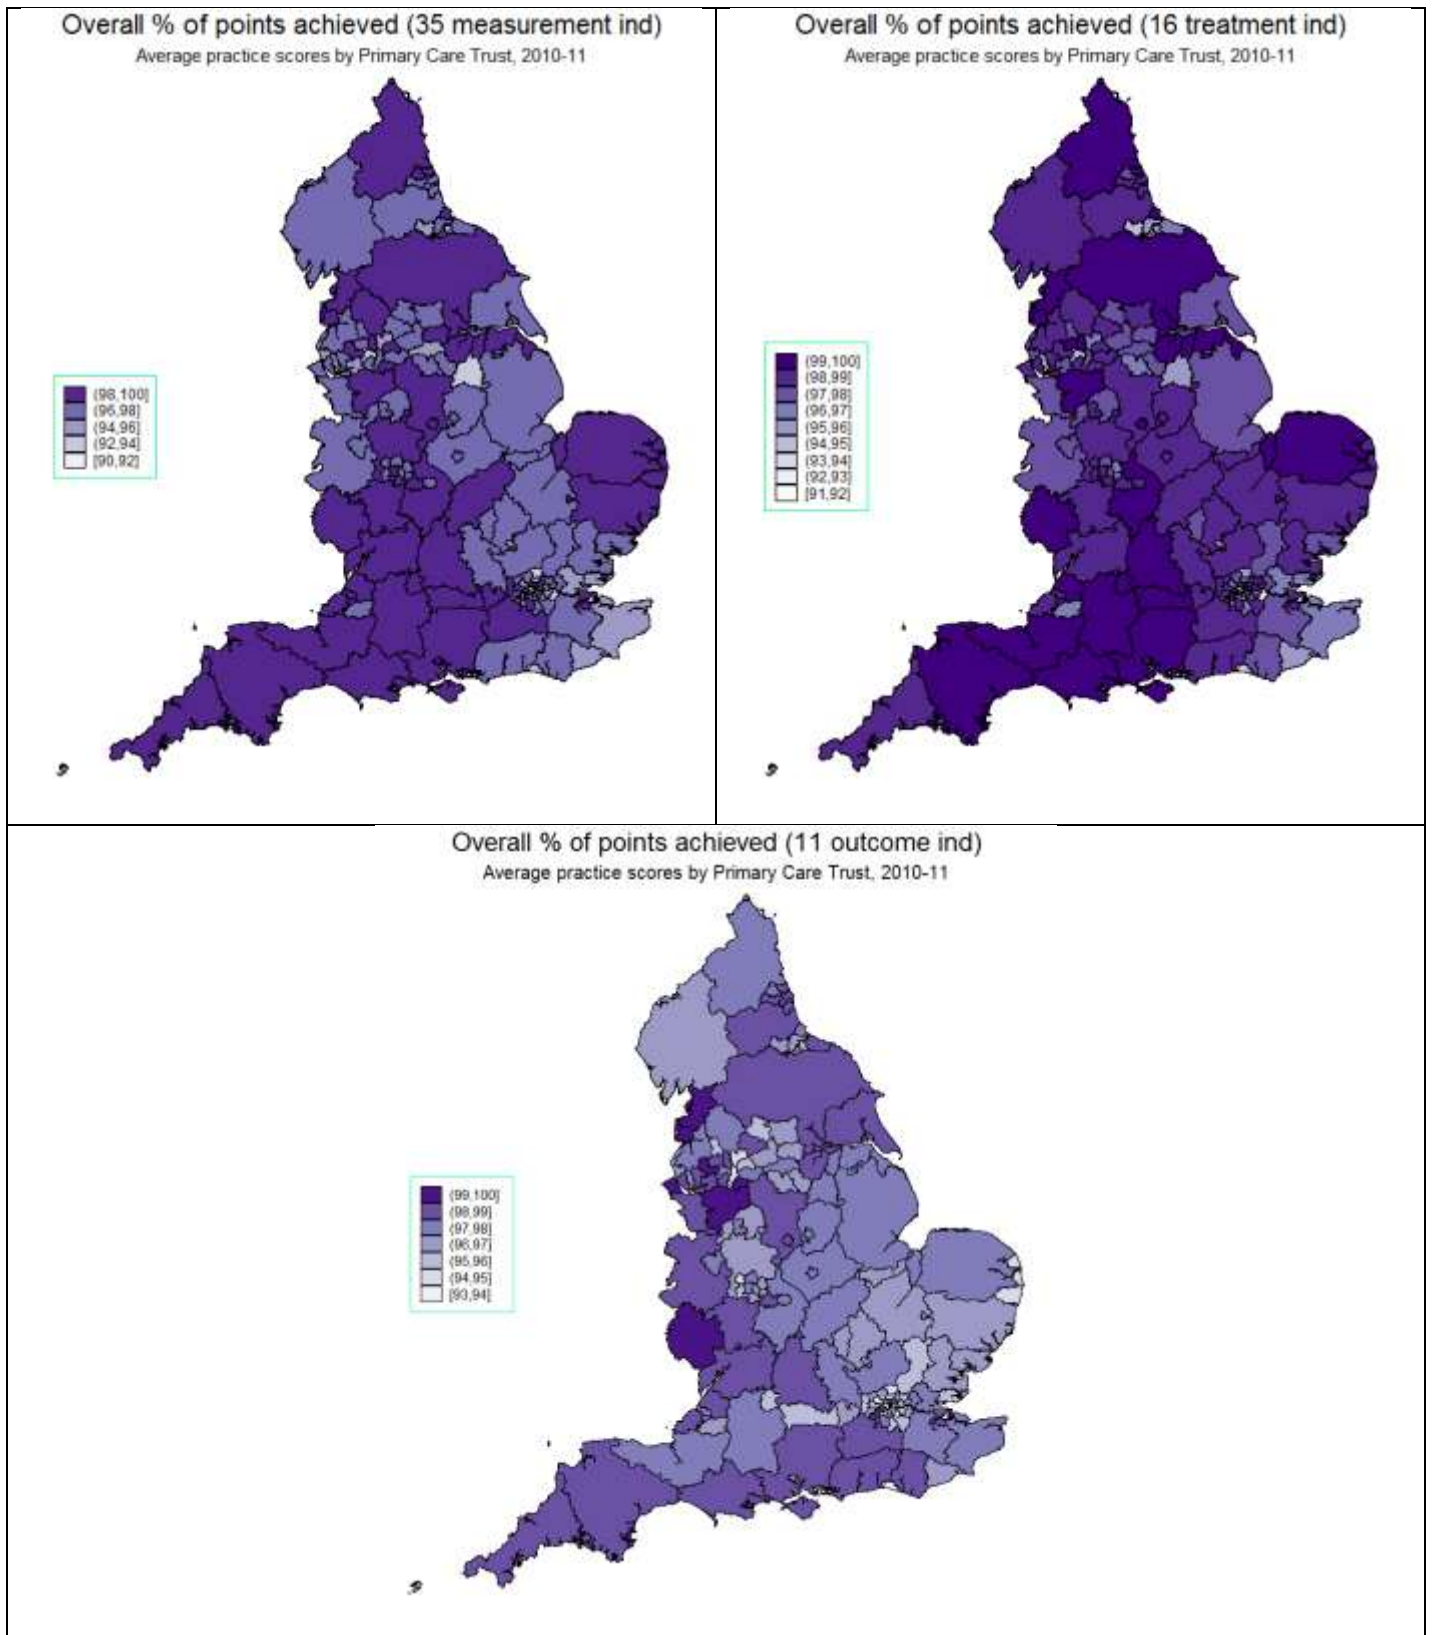

Supplement: bmjopen-2013-003190supp_appendix.pdf [file bmjopen-2013-003190supp_appendix.pdf]
